# Supplementary material for: Nuclear energy transition and CO2 emissions nexus in 28 nuclear electricity-producing countries with different income levels
Source: PeerJ. 2022 Jul 25;10:e13780. doi: 10.7717/peerj.13780 (PMC9332342; doi:10.7717/peerj.13780)
Supplement: Supplemental Information 1 [file peerj-10-13780-s001.xlsx]

## Sheet: Sheet1
		ID	Time	NEC	CO2	OIL	GAS	COAL	Y	Population
	Argentina	1	1996	0.07459	126.333	0.935272	1.08426	0.0279605	7994.24	35246376
		1	1997	0.07961	125.011	0.991031	0.999185	0.0220598	8543.03	35657438
		1	1998	0.07453	131.952	1.01978	1.06816	0.0296547	8772.07	36063451
		1	1999	0.07106	136.43	1.03306	1.13292	0.0355877	8381.25	36467218
		1	2000	0.06177	131.389	0.953632	1.16268	0.0270455	8224.11	36870796
		1	2001	0.0701316	120.691	0.883062	1.08846	0.0221647	7776.14	37275644
		1	2002	0.0574589	115.999	0.838135	1.05975	0.0165107	6854.3	37681743
		1	2003	0.074205	125.413	0.854719	1.21065	0.0201379	7380.47	38087866
		1	2004	0.0766852	137.108	0.916871	1.32513	0.0342713	7962.41	38491970
		1	2005	0.066555	145.272	0.960329	1.4144	0.0394619	8577.87	38892924
		1	2006	0.0742964	151.18	1.01287	1.46342	0.0357258	9174.5	39289876
		1	2007	0.0693664	164.53	1.12948	1.53764	0.0516973	9901.51	39684303
		1	2008	0.070266	166.024	1.14139	1.55479	0.0630578	10201.5	40080159
		1	2009	0.0772839	158.206	1.09101	1.50608	0.0346354	9502.24	40482786
		1	2010	0.0676767	167.094	1.18137	1.51515	0.0484995	10386	40788453
		1	2011	0.0597073	173.09	1.22402	1.57823	0.0526271	10883.3	41261490
		1	2012	0.059364	181.898	1.30052	1.64391	0.0492091	10649.8	41733271
		1	2013	0.0572091	187.826	1.38162	1.657	0.0537815	10784.6	42202935
		1	2014	0.0505175	187.811	1.3677	1.66158	0.0572102	10398.7	42669500
		1	2015	0.0641052	191.261	1.39431	1.67949	0.0569309	10568.2	43131966
		1	2016	0.0750062	190.164	1.35106	1.73556	0.0438791	10239.5	43590368
		1	2017	0.054792	188.484	1.33523	1.7388	0.045091	10419.5	44044811
		1	2018	0.0614863	185.898	1.27156	1.75335	0.0493529	10049.6	44494502
		1	2019	0.0752641	173.787	1.14772	1.67614	0.0292463	9742.46	44938712
	Belgium	2	1996	0.43336	137.192	1.26811	0.498315	0.354628	35192	10156637
		2	1997	0.47408	135.914	1.29935	0.475361	0.331064	36438.8	10181245
		2	1998	0.46165	139.858	1.31739	0.520718	0.329317	37074.4	10203008
		2	1999	0.49017	133.263	1.27372	0.556057	0.288546	38300	10226419
		2	2000	0.48157	136.288	1.29433	0.558946	0.319261	39627.2	10251250
		2	2001	0.46048	136.339	1.31413	0.552154	0.304108	39925.4	10286570
		2	2002	0.467489	134.152	1.31963	0.569971	0.260699	40425.3	10332785
		2	2003	0.464679	141.249	1.3947	0.607197	0.252177	40674.2	10376133
		2	2004	0.461066	140.106	1.41164	0.618768	0.234556	41944.9	10421137
		2	2005	0.460888	136.155	1.40395	0.608165	0.215517	42683.3	10478617
		2	2006	0.448848	138.225	1.39947	0.626	0.212676	43485	10547958
		2	2007	0.461171	137.778	1.41347	0.630685	0.194352	44754	10625700
		2	2008	0.433038	139.135	1.48263	0.626452	0.191938	44600.3	10709973
		2	2009	0.445986	124.625	1.33397	0.632666	0.123642	43348.8	10796493
		2	2010	0.450027	133.526	1.38217	0.698544	0.156962	44184.9	10895586
		2	2011	0.449988	120.605	1.2939	0.594864	0.147776	44352.9	11038264
		2	2012	0.373645	116.199	1.24455	0.60264	0.139186	44404.5	11106932
		2	2013	0.393044	117.33	1.28128	0.595188	0.147267	44398.7	11159407
		2	2014	0.308776	108.796	1.25959	0.520668	0.140419	44899.7	11209057
		2	2015	0.237724	115.247	1.29998	0.570596	0.141194	45551.6	11274196
		2	2016	0.394025	116.897	1.31997	0.582811	0.1338	45895.7	11331422
		2	2017	0.380041	118.822	1.34243	0.590814	0.130743	46460.6	11375158
		2	2018	0.255868	125.478	1.42082	0.607468	0.129975	47076.5	11427054
		2	2019	0.387986	121.627	1.32995	0.625806	0.130168	47658.4	11488980
	Brazil	3	1996	0.02427	270.787	3.32295	0.207459	0.511629	8591.02	164614682
		3	1997	0.03169	283.85	3.57137	0.22545	0.514697	8744.85	167209046
		3	1998	0.03265	294.403	3.72288	0.236273	0.504145	8641.28	169785253
		3	1999	0.03977	297.389	3.7797	0.28037	0.510508	8554.07	172318674
		3	2000	0.06046	301.711	3.72166	0.349362	0.544253	8803.15	174790339
		3	2001	0.141863	311.021	3.78265	0.442303	0.535637	8804.33	177196051
		3	2002	0.136575	311.104	3.70651	0.522585	0.518437	8954.84	179537523
		3	2003	0.131011	308.233	3.59685	0.584903	0.537907	8943.83	181809244
		3	2004	0.113152	322.865	3.7171	0.695609	0.563965	9346.04	184006479
		3	2005	0.0954313	329.981	3.79499	0.724576	0.543905	9535.42	186127108
		3	2006	0.132351	335.42	3.86822	0.762112	0.536306	9805.72	188167353
		3	2007	0.118095	349.82	4.0215	0.784859	0.568338	10293.5	190130445
		3	2008	0.132745	373.032	4.20003	0.923792	0.576476	10710.9	192030362
		3	2009	0.122372	350.502	4.16206	0.74407	0.465146	10595	193886505
		3	2010	0.136322	398.329	4.53927	0.992764	0.605512	11286.2	195713637
		3	2011	0.146091	423.762	4.82594	0.989403	0.646811	11627.8	197514541
		3	2012	0.14872	442.857	4.97789	1.17276	0.640067	11745.8	199287292
		3	2013	0.142398	482.873	5.26429	1.38178	0.689917	11993.5	201035904
		3	2014	0.140893	504.527	5.43343	1.4636	0.733559	11951.2	202763744
		3	2015	0.134186	487.643	5.09161	1.54572	0.73792	11431.2	204471759
		3	2016	0.143624	450.707	4.82966	1.33516	0.666527	10966	206163056
		3	2017	0.141653	458.012	4.90499	1.35475	0.702977	11021.7	207833825
		3	2018	0.14024	443.135	4.72107	1.29207	0.687378	11130.7	209469320
		3	2019	0.143778	442.255	4.81017	1.2864	0.648124	11203.3	211049519
	Bulgaria	4	1996	0.18082	56.814	0.244546	0.194703	0.319044	4526.65	8362826
		4	1997	0.17751	56.0845	0.193568	0.15533	0.363799	3907.91	8312068
		4	1998	0.16899	53.7739	0.203904	0.129965	0.346495	4102.66	8256786
		4	1999	0.15814	45.8003	0.18524	0.112603	0.285312	3784.08	8210624
		4	2000	0.18178	43.4344	0.182554	0.122646	0.263497	3984.67	8170172
		4	2001	0.19426	46.3685	0.188733	0.103101	0.300342	4219.94	8009142
		4	2002	0.199611	44.5636	0.194968	0.0914148	0.276587	4569.27	7837161
		4	2003	0.169477	48.5771	0.208326	0.0965988	0.309666	4842.89	7775327
		4	2004	0.163866	46.6668	0.202826	0.0943155	0.295907	5193.91	7716860
		4	2005	0.180627	48.5467	0.221899	0.11759	0.289836	5607.53	7658972
		4	2006	0.187574	49.3914	0.22437	0.121165	0.294299	6034.62	7601022
		4	2007	0.140024	52.7358	0.221033	0.122108	0.33109	6477.77	7545338
		4	2008	0.149816	50.3447	0.21252	0.122117	0.315593	6920.39	7492561
		4	2009	0.144084	43.5325	0.191471	0.0873495	0.265656	6730.06	7444443
		4	2010	0.143135	45.5884	0.17092	0.0962019	0.288169	6812.41	7395599
		4	2011	0.152198	50.5209	0.163162	0.11014	0.33892	7017.66	7348328
		4	2012	0.14637	45.8131	0.16905	0.102644	0.289541	7083.6	7305888
		4	2013	0.130614	40.6693	0.156262	0.0991584	0.248852	7146.56	7265115
		4	2014	0.145365	43.1173	0.168908	0.0985014	0.265866	7322.81	7223938
		4	2015	0.14006	45.8317	0.1897	0.108013	0.274451	7663.72	7177991
		4	2016	0.142823	43.0157	0.191394	0.112502	0.238409	8012.51	7127822
		4	2017	0.139909	45.6981	0.200312	0.115691	0.255601	8353.97	7075947
		4	2018	0.144279	42.5343	0.199663	0.108825	0.22841	8674.72	7025037
		4	2019	0.14758	41.1993	0.208489	0.101912	0.212665	9058.74	6975761
	Canada	5	1996	0.921221	480.56	3.75038	2.8281	1.12509	36083.3	29610218
		5	1997	0.819547	493.985	3.86526	2.8838	1.17589	36083.3	29905948
		5	1998	0.709926	508.337	3.93992	2.83526	1.25718	36785.8	30155173
		5	1999	0.7298	513.231	4.01599	3.03089	1.20849	37936.7	30401286
		5	2000	0.722937	533.106	3.99305	3.21195	1.27868	39433.4	30685730
		5	2001	0.756675	535.837	4.10567	3.02552	1.32884	39555.6	31020902
		5	2002	0.740323	548.654	4.25899	3.14879	1.33658	40466.8	31360079
		5	2003	0.729414	557.764	4.41787	3.23225	1.33329	41632.1	31644028
		5	2004	0.874711	555.307	4.61132	3.16151	1.25948	42859.8	31940655
		5	2005	0.885076	556.525	4.484	3.18169	1.25404	44578	32243753
		5	2006	0.936121	548.96	4.52366	3.15302	1.21476	45968.2	32571174
		5	2007	0.887803	574.708	4.64872	3.361	1.26997	48650.9	32889025
		5	2008	0.906146	560.947	4.48586	3.35532	1.20683	48611.8	33247118
		5	2009	0.844948	532.928	4.37023	3.25895	1.00828	46652.5	33628895
		5	2010	0.845048	547.065	4.56745	3.31257	1.03315	47562.1	34004889
		5	2011	0.867045	551.376	4.57641	3.64046	0.931414	48581	34339328
		5	2012	0.873514	547.533	4.63596	3.59299	0.890688	48903.2	34714222
		5	2013	0.946761	561.274	4.61321	3.81401	0.861579	49516.3	35082954
		5	2014	0.976035	567.542	4.61188	3.97271	0.822836	50427.9	35437435
		5	2015	0.92074	566.287	4.62449	3.97634	0.824117	50382.9	35702908
		5	2016	0.911875	550.383	4.61166	3.83196	0.770602	50314.4	36109487
		5	2017	0.905353	563.06	4.57162	3.971	0.783998	51225.7	36545295
		5	2018	0.895016	573.347	4.73416	4.19117	0.652789	51734.3	37065178
		5	2019	0.895841	575.68	4.78073	4.24239	0.634692	51956.8	37593384
	China	6	1996	0.14338	3177.72	7.49833	0.674504	29.1434	1332.35	1217550000
		6	1997	0.14418	3166.79	8.18379	0.712747	28.5549	1440.6	1230075000
		6	1998	0.141	3163.36	8.40735	0.734988	28.3382	1538.79	1241935000
		6	1999	0.14949	3294.43	8.94661	0.779871	29.1565	1642.4	1252735000
		6	2000	0.16737	3360.87	9.58009	0.889047	29.5611	1767.86	1262645000
		6	2001	0.173585	3523.08	9.79512	0.995248	31.0887	1901.36	1271850000
		6	2002	0.248028	3843.4	10.5768	1.05889	34.0828	2061.17	1280400000
		6	2003	0.425085	4532.15	11.7775	1.23029	40.619	2253.99	1288400000
		6	2004	0.491832	5334.89	13.7523	1.43942	47.359	2467.25	1296075000
		6	2005	0.51408	6098.18	13.9924	1.6911	55.4584	2732.27	1303720000
		6	2006	0.527735	6677.29	15.0299	2.08022	60.9062	3062.69	1311020000
		6	2007	0.594118	7239.76	15.7718	2.5588	66.3261	3480.31	1317885000
		6	2008	0.649955	7378.25	16.0889	2.94958	67.3773	3796.68	1324655000
		6	2009	0.661587	7710.06	16.6944	3.24807	70.5802	4132.91	1331260000
		6	2010	0.701567	8142.22	18.992	3.91947	73.225	4550.45	1337705000
		6	2011	0.813512	8823.43	19.6824	4.86586	79.7105	4961.23	1344130000
		6	2012	0.91168	9000.4	20.6324	5.43159	80.7128	5325.36	1350695000
		6	2013	1.02769	9242.51	21.5385	6.18763	82.4411	5710.67	1357380000
		6	2014	1.2205	9288.14	22.3859	6.78107	82.4928	6103.75	1364270000
		6	2015	1.56077	9274.76	24.2375	7.00882	80.9368	6500.42	1371220000
		6	2016	1.92996	9274.31	25.0629	7.53988	80.2131	6908.11	1378665000
		6	2017	2.2329	9462.73	26.2026	8.68507	80.5876	7346.84	1386395000
		6	2018	2.63947	9648.65	27.0643	10.2213	81.1097	7807.06	1392730000
		6	2019	3.10844	9806.04	27.935	11.1016	81.789	8242.05	1397715000
	Czech Republic	7	1996	0.1285	132.878	0.358721	0.315673	0.979627	14162.1	10315241
		7	1997	0.12494	127.159	0.342084	0.32108	0.92045	14103.9	10304131
		7	1998	0.13178	121.649	0.353108	0.321769	0.853208	14066.9	10294373
		7	1999	0.13357	113.924	0.351503	0.323498	0.777399	14276.2	10283860
		7	2000	0.1359	124.097	0.339945	0.314016	0.888181	14889.1	10255063
		7	2001	0.146535	125.089	0.359711	0.33629	0.871669	15399.9	10216605
		7	2002	0.184964	120.781	0.348303	0.324981	0.85547	15671.9	10196916
		7	2003	0.253744	123.997	0.372713	0.328337	0.869479	16238.1	10193998
		7	2004	0.25654	124.844	0.410706	0.326064	0.870798	17014.7	10197101
		7	2005	0.239451	123.426	0.428966	0.322528	0.841309	18112.9	10211216
		7	2006	0.250636	125.969	0.423037	0.317926	0.871111	19286.3	10238905
		7	2007	0.250271	125.554	0.420092	0.303068	0.869453	20242.1	10298828
		7	2008	0.252317	120.326	0.422035	0.300342	0.824579	20614.2	10384603
		7	2009	0.256963	113.531	0.407444	0.284881	0.761674	19542.5	10443936
		7	2010	0.262711	116.523	0.384744	0.337856	0.786172	19960.1	10474410
		7	2011	0.263856	113.074	0.389815	0.285086	0.773959	20269.5	10496088
		7	2012	0.281188	109.311	0.384969	0.287051	0.742137	20082.3	10510785
		7	2013	0.283375	104.98	0.367339	0.290832	0.707416	20066.4	10514272
		7	2014	0.277827	101.974	0.388716	0.258833	0.685569	20498.7	10525347
		7	2015	0.244443	102.773	0.377556	0.27142	0.6835	21560.8	10546059
		7	2016	0.218221	104.791	0.354501	0.293759	0.688346	22065.5	10566332
		7	2017	0.255056	102.668	0.415066	0.301492	0.652791	23144.4	10594438
		7	2018	0.267717	101.695	0.41801	0.287382	0.648715	23805	10629928
		7	2019	0.269626	98.4721	0.423373	0.299698	0.602049	24260	10671870
	Finland	8	1996	0.196621	64.8219	0.440549	0.123082	0.294289	32995.5	5124573
		8	1997	0.211063	62.8374	0.434104	0.121098	0.278741	34981.1	5139835
		8	1998	0.2208	60.2024	0.452846	0.138731	0.22874	36792.3	5153498
		8	1999	0.232211	59.8673	0.457844	0.138888	0.221636	38314.6	5165474
		8	2000	0.227105	58.8748	0.455489	0.141876	0.209978	40442.6	5176209
		8	2001	0.228547	63.8558	0.446847	0.153936	0.253761	41403.8	5188008
		8	2002	0.222303	66.6736	0.457326	0.152856	0.275728	42008.7	5200598
		8	2003	0.225369	74.9189	0.472003	0.1692	0.344133	42748.4	5213014
		8	2004	0.22377	68.7995	0.439979	0.163008	0.309166	44326.1	5228172
		8	2005	0.227882	58.2112	0.456369	0.149148	0.198608	45402.6	5246096
		8	2006	0.222877	68.5698	0.442614	0.159408	0.310154	47050.2	5266268
		8	2007	0.226492	66.3329	0.446304	0.147456	0.292871	49333.3	5288720
		8	2008	0.220569	58.583	0.431134	0.15077	0.223357	49489.1	5313399
		8	2009	0.224686	56.1854	0.406181	0.134568	0.224963	45276.1	5338871
		8	2010	0.216275	63.9142	0.421792	0.14868	0.28413	46505.3	5363352
		8	2011	0.218653	56.578	0.405498	0.130032	0.230823	47469.5	5388272
		8	2012	0.21535	50.7757	0.392372	0.115002	0.189006	46584	5413971
		8	2013	0.219978	51.9115	0.410218	0.106944	0.208949	45951.7	5438972
		8	2014	0.218395	47.578	0.38777	0.095604	0.187289	45595.1	5461512
		8	2015	0.214027	44.7374	0.387979	0.082363	0.159858	45692.2	5479531
		8	2016	0.212324	47.6331	0.410486	0.072276	0.183316	46842	5495303
		8	2017	0.204385	44.9587	0.397709	0.065967	0.167924	48224.1	5508214
		8	2018	0.195776	46.5193	0.398119	0.075646	0.175973	48791.9	5515525
		8	2019	0.215024	43.3869	0.389629	0.0733	0.147797	49358.6	5521606
	France	9	1996	3.9734	372.536	3.93507	1.36853	0.653978	34309.1	59753095
		9	1997	3.95483	361.158	3.96401	1.31209	0.572754	34986.6	59964841
		9	1998	3.8799	384.864	4.10801	1.39894	0.681192	36108.8	60186284
		9	1999	3.94244	384.363	4.16581	1.42636	0.610017	37152.6	60496708
		9	2000	4.15162	381.5	4.10033	1.49747	0.593141	38346.8	60912500
		9	2001	4.18342	383.407	4.12044	1.57206	0.519076	38823.9	61357432
		9	2002	4.31124	380.13	4.00673	1.56939	0.534996	38980.3	61805266
		9	2003	4.32588	387.163	4.01372	1.64617	0.568726	39023.6	62244880
		9	2004	4.36821	389.109	4.04947	1.68093	0.541398	39833.5	62704901
		9	2005	4.3724	389.771	3.9934	1.71765	0.562264	40191.9	63179356
		9	2006	4.33203	380.052	3.98199	1.6589	0.519543	40890.2	63621376
		9	2007	4.20492	370.464	3.88158	1.61139	0.537872	41623.4	64016227
		9	2008	4.17611	369.747	3.80679	1.66991	0.505472	41496.9	64374979
		9	2009	3.86973	354.803	3.65521	1.61032	0.450102	40097.8	64707035
		9	2010	4.02231	360.362	3.52965	1.78432	0.481935	40678	65027505
		9	2011	4.12716	333.845	3.4538	1.54869	0.408985	41369.4	65342789
		9	2012	3.94467	335.255	3.33781	1.59999	0.463321	41298.5	65659814
		9	2013	3.90505	334.614	3.29446	1.62515	0.484179	41323.3	65998685
		9	2014	3.99888	301.2	3.18763	1.3647	0.361612	41521.2	66312067
		9	2015	3.98372	307.18	3.18756	1.46706	0.359547	41834.3	66548272
		9	2016	3.65023	312.764	3.16561	1.60308	0.351107	42181.2	66724104
		9	2017	3.5852	317.518	3.17904	1.61157	0.383255	43022.7	66918020
		9	2018	3.70283	306.521	3.16965	1.54218	0.342934	43674	67101930
		9	2019	3.55694	298.784	3.14403	1.57183	0.267958	44235.9	67248926
	Germany	10	1996	1.61613	914.845	5.97196	3.13168	3.77785	34999.8	81914831
		10	1997	1.70328	887.993	5.93614	2.99172	3.66055	35575	82034771
		10	1998	1.616	879.036	5.94258	3.01914	3.57304	36285.9	82047195
		10	1999	1.70004	855.915	5.76399	3.01029	3.44009	36946.8	82100243
		10	2000	1.69606	854.428	5.65357	2.98528	3.57154	37971.5	82211508
		10	2001	1.70193	871.673	5.72747	3.14814	3.58177	38545	82349925
		10	2002	1.62715	859.047	5.53601	3.14326	3.58974	38404.1	82488495
		10	2003	1.61886	861.991	5.42778	3.18139	3.64903	38114.1	82534176
		10	2004	1.62809	847.526	5.36576	3.19756	3.5572	38570.4	82516260
		10	2005	1.5788	826.318	5.25621	3.25012	3.40339	38874.7	82469422
		10	2006	1.61041	843.777	5.24605	3.31225	3.53992	40403.8	82376451
		10	2007	1.34386	811.068	4.75005	3.1909	3.62983	41662.1	82266372
		10	2008	1.41384	809.368	5.03665	3.22202	3.35451	42142.1	82110097
		10	2009	1.27436	753.59	4.82342	3.03948	3.00345	39843.4	81902307
		10	2010	1.31933	783.163	4.88752	3.17056	3.22622	41572.5	81776930
		10	2011	1.00729	763.69	4.72777	2.91099	3.27885	44012.6	80274983
		10	2012	0.922265	773.001	4.6994	2.91996	3.36987	44113.9	80425823
		10	2013	0.896709	797.572	4.80334	3.05908	3.46823	44186.2	80645605
		10	2014	0.889864	751.081	4.67394	2.66022	3.33322	44974.6	80982500
		10	2015	0.835911	755.631	4.66755	2.77033	3.2942	45252.2	81686611
		10	2016	0.766213	770.457	4.76395	3.05585	3.20377	45889.4	82348669
		10	2017	0.68692	760.949	4.86735	3.15859	3.00935	46907.8	82657002
		10	2018	0.680045	734.436	4.63206	3.09063	2.90408	47360	82905782
		10	2019	0.669213	681.441	4.66105	3.19273	2.24718	47515.8	83092962
	Hungary	11	1996	0.1418	58.7575	0.295945	0.428622	0.1797	8992.87	10311238
		11	1997	0.13968	57.2495	0.302692	0.40649	0.171654	9294.24	10290486
		11	1998	0.13949	57.8776	0.321195	0.409314	0.166578	9679.21	10266570
		11	1999	0.14096	58.6202	0.304339	0.414705	0.173414	10004.8	10237530
		11	2000	0.1418	55.3167	0.294983	0.404309	0.161975	10480.1	10210971
		11	2001	0.140343	56.6733	0.284754	0.448433	0.153898	10932.1	10187576
		11	2002	0.13773	55.9284	0.277693	0.452616	0.148489	11483.1	10158608
		11	2003	0.108012	58.025	0.260179	0.497645	0.151958	11986.4	10129552
		11	2004	0.116114	57.3444	0.27651	0.490368	0.144086	12592.3	10107146
		11	2005	0.133962	57.5307	0.318935	0.506349	0.128137	13152.8	10087065
		11	2006	0.12953	57.4034	0.337038	0.479672	0.128624	13704.3	10071370
		11	2007	0.140349	55.4059	0.33579	0.44819	0.130804	13758.8	10055780
		11	2008	0.140817	54.1933	0.319027	0.442161	0.127058	13928.8	10038188
		11	2009	0.14569	48.2281	0.302875	0.383171	0.106982	13015.8	10022650
		11	2010	0.147941	48.7077	0.284039	0.410955	0.112711	13191.6	10000023
		11	2011	0.14633	48.688	0.277066	0.392887	0.113571	13485.3	9971727
		11	2012	0.146444	44.5999	0.259465	0.350639	0.109273	13368	9920362
		11	2013	0.14166	42.1277	0.255502	0.326885	0.095677	13654.3	9893082
		11	2014	0.143368	41.3022	0.282508	0.292306	0.0945759	14270.1	9866468
		11	2015	0.144206	43.8495	0.302637	0.313584	0.0980139	14850.4	9843028
		11	2016	0.14534	44.9261	0.304045	0.336104	0.0918234	15213.1	9814023
		11	2017	0.144878	46.8924	0.325794	0.357629	0.093856	15912	9787966
		11	2018	0.140769	47.3262	0.349422	0.346407	0.0887949	16792.5	9775564
		11	2019	0.145197	47.1825	0.353083	0.354384	0.0768648	17579.8	9771141
	India	12	1996	0.0840128	812.453	3.50194	0.710342	6.04254	711.929	982365248
		12	1997	0.100718	854.977	3.74348	0.772295	6.31931	727.043	1000900028
		12	1998	0.113711	895.697	4.00863	0.847544	6.52917	757.934	1019483586
		12	1999	0.127279	914.306	4.40128	0.868441	6.46803	810.217	1038058154
		12	2000	0.157684	959.779	4.61245	0.913057	6.8802	826.592	1056575548
		12	2001	0.187659	968.643	4.62608	0.915399	6.93703	851.617	1075000094
		12	2002	0.191028	1008.58	4.72188	0.955959	7.24604	869.201	1093317187
		12	2003	0.177928	1049.38	4.81013	1.02337	7.58874	922.168	1111523146
		12	2004	0.207144	1112.12	5.09118	1.10409	8.0767	979.284	1129623466
		12	2005	0.17166	1200.25	5.17732	1.23572	8.84201	1040.31	1147609924
		12	2006	0.169664	1252.05	5.46916	1.29158	9.18153	1106.93	1165486291
		12	2007	0.170516	1363.12	5.84244	1.39717	10.0496	1173.88	1183209471
		12	2008	0.144739	1461.95	6.13699	1.43956	10.8745	1192.51	1200669762
		12	2009	0.158819	1588.32	6.45652	1.76789	11.7642	1268.25	1217726217
		12	2010	0.21666	1650.19	6.59725	2.12262	12.1627	1357.56	1234281163
		12	2011	0.300623	1728.16	6.91278	2.17029	12.7544	1410.43	1250287939
		12	2012	0.307295	1842.43	7.3311	2.00517	13.8159	1469.18	1265780243
		12	2013	0.306998	1925.73	7.38454	1.76469	14.7852	1544.62	1280842119
		12	2014	0.31778	2079.04	7.58813	1.74606	16.2347	1640.19	1295600768
		12	2015	0.348872	2146.53	8.20064	1.72105	16.5537	1751.66	1310152392
		12	2016	0.343096	2238.31	8.99291	1.82848	16.8423	1875.72	1324517250
		12	2017	0.33673	2320.63	9.25879	1.93448	17.4409	1982	1338676779
		12	2018	0.349401	2445.76	9.67693	2.09124	18.5877	2089.68	1352642283
		12	2019	0.402599	2468.37	9.98781	2.13301	18.5977	2152.22	1366417756
	Japan	13	1996	2.96501	1211.3	11.9306	2.32838	3.6201	41514.9	125757000
		13	1997	3.21157	1210.48	11.8007	2.41685	3.71861	41861.8	126057000
		13	1998	3.25974	1179.22	11.3805	2.4899	3.54499	41277.1	126400000
		13	1999	3.17235	1211.15	11.5697	2.61511	3.72952	41098	126631000
		13	2000	3.19122	1233.18	11.4061	2.72394	3.99817	42169.7	126843000
		13	2001	3.18457	1226.37	11.0652	2.79822	4.09376	42239.2	127149000
		13	2002	3.10203	1237.23	10.9896	2.73766	4.34847	42190.8	127445000
		13	2003	2.25653	1277.97	11.2488	3.00594	4.46853	42744	127718000
		13	2004	2.78582	1261.98	10.9538	2.90175	4.58677	43671.7	127761000
		13	2005	2.83765	1295.11	10.7846	2.97821	4.80533	44393.6	127773000
		13	2006	2.92808	1272.59	10.3983	3.18781	4.72371	44995.5	127854000
		13	2007	2.66802	1286.91	10.0763	3.43404	4.95865	45687.3	128001000
		13	2008	2.39235	1297.08	9.70248	3.56758	5.09321	45165.8	128063000
		13	2009	2.59392	1127.71	8.69548	3.32921	4.27301	42724.8	128047000
		13	2010	2.74419	1197.9	8.78213	3.59772	4.86984	44507.7	128070000
		13	2011	1.51999	1206.07	8.78328	4.03291	4.61754	44538.7	127833000
		13	2012	0.166829	1292.15	9.36988	4.43574	4.87512	45276.9	127629000
		13	2013	0.134593	1279.71	8.95082	4.44733	5.07398	46249.2	127445000
		13	2014	1e-12	1246.36	8.50004	4.49108	4.98865	46484.2	127276000
		13	2015	0.0412044	1207.02	8.16083	4.27384	5.03273	47102.6	127141000
		13	2016	0.160043	1189.87	7.93739	4.19103	5.02339	47403	126994511
		13	2017	0.261666	1181.34	7.8214	4.21151	5.09747	48510.6	126785797
		13	2018	0.439369	1158.29	7.58122	4.16549	4.99175	48766.1	126529100
		13	2019	0.585105	1117.61	7.32167	3.89236	4.90534	49000.3	126264931
	Mexico	14	1996	0.07878	306.298	3.38453	1.12602	0.240479	8109.2	93147045
		14	1997	0.10456	319.927	3.49486	1.13175	0.240711	8530.35	94611008
		14	1998	0.09265	337.091	3.67887	1.20524	0.246052	8835.88	96056313
		14	1999	0.10002	333.903	3.64515	1.21647	0.250371	8946.13	97484823
		14	2000	0.08221	353.847	3.81748	1.29288	0.274273	9253.97	98899845
		14	2001	0.0866934	352.349	3.75411	1.30286	0.301225	9088.05	100298152
		14	2002	0.0962086	371.574	3.59001	1.47848	0.504381	8960.55	101684764
		14	2003	0.102996	372.853	3.68425	1.60234	0.371946	8967.03	103081020
		14	2004	0.0895969	390.439	3.83396	1.72879	0.380591	9190.74	104514934
		14	2005	0.10463	416.588	3.92683	1.89764	0.480346	9270.66	106005199
		14	2006	0.104562	427.339	3.88671	2.09838	0.515514	9547.33	107560155
		14	2007	0.0996482	429.601	4.03753	2.05349	0.473702	9622.05	109170503
		14	2008	0.0931682	432.235	4.02766	2.15988	0.423163	9587.64	110815272
		14	2009	0.0991769	433.545	3.89122	2.34608	0.431087	8947.74	112463886
		14	2010	0.0551855	442.614	3.90811	2.3776	0.533228	9271.4	114092961
		14	2011	0.0941248	465.845	3.97326	2.54911	0.616777	9477.89	115695468
		14	2012	0.0813181	473.973	4.0374	2.65154	0.537358	9690.87	117274156
		14	2013	0.108758	472.837	3.92549	2.80062	0.533616	9693.72	118827158
		14	2014	0.0886595	459.637	3.7478	2.83854	0.53258	9843.4	120355137
		14	2015	0.105435	463.122	3.70474	2.90818	0.531542	10042.1	121858251
		14	2016	0.0956673	468.79	3.73163	2.98908	0.52068	10183	123333379
		14	2017	0.0979458	476.947	3.5931	3.09721	0.63631	10277.9	124777326
		14	2018	0.12213	467.965	3.50545	3.15309	0.567164	10385.8	126190782
		14	2019	0.101962	449.083	3.23631	3.16704	0.541493	10267.5	127575529
	Netherlands	15	1996	0.0416	219.557	1.61056	1.6279	0.36	39883.9	15530498
		15	1997	0.02408	217.237	1.67309	1.5253	0.35	41396.8	15610650
		15	1998	0.0380909	218.063	1.69296	1.5062	0.357	43061.2	15707209
		15	1999	0.0382821	215.111	1.72546	1.4716	0.313	44928.9	15812088
		15	2000	0.0391921	216.196	1.75026	1.4757	0.325	46480.5	15925513
		15	2001	0.0394678	225.908	1.83499	1.5055	0.346	47204.4	16046180
		15	2002	0.0386304	225.955	1.84338	1.4903	0.348	47006	16148929
		15	2003	0.0394072	225.438	1.84611	1.5006	0.36	46857.6	16225302
		15	2004	0.0372464	231.406	1.93112	1.5364	0.355	47621.9	16281779
		15	2005	0.0387095	233.102	2.04992	1.4924	0.339	48485.1	16319868
		15	2006	0.0333852	231.601	2.04146	1.4331	0.323	50082.7	16346101
		15	2007	0.0401655	229.132	2.10067	1.397	0.352	51859.3	16381696
		15	2008	0.0396174	227.22	1.99756	1.454	0.333	52779	16445593
		15	2009	0.0401231	217.675	1.90828	1.4889	0.314	50582.8	16530388
		15	2010	0.0372566	226.519	1.94375	1.6833	0.316	50999.7	16615394
		15	2011	0.0386304	219.435	1.96725	1.4734	0.3117	51549.8	16693074
		15	2012	0.0363	212.215	1.86794	1.4142	0.3425	50830.2	16754962
		15	2013	0.0266447	208.245	1.77485	1.408	0.3427	50614.6	16804432
		15	2014	0.0374832	197.587	1.69341	1.241	0.3791	51150.7	16865008
		15	2015	0.0371393	206.849	1.65311	1.2269	0.4632	51922.2	16939923
		15	2016	0.0358534	209.972	1.7059	1.2655	0.4294	52778.5	17030314
		15	2017	0.0306223	202.898	1.64122	1.299	0.3851	53994.7	17131296
		15	2018	0.0314479	198.639	1.6823	1.276	0.346	54947.7	17231624
		15	2019	0.034853	194.022	1.64244	1.3327	0.2688	55504.6	17344874
	Pakistan	16	1996	0.00327036	84.744	0.704123	0.509517	0.0937843	818.889	127349293
		16	1997	0.00450779	85.8525	0.725727	0.508014	0.0876716	803.791	131057432
		16	1998	0.00393327	88.3181	0.750383	0.535068	0.0877553	801.147	134843233
		16	1999	0.000795492	94.1377	0.77765	0.610218	0.0877972	807.817	138624625
		16	2000	0.00945752	97.8056	0.803096	0.64629	0.0849083	820.226	142343583
		16	2001	0.0207241	98.8841	0.787399	0.682362	0.0881321	828.231	145978408
		16	2002	0.0187146	101.202	0.767506	0.739777	0.0988085	828.731	149549695
		16	2003	0.0186813	106.643	0.681261	0.919814	0.125028	856.316	153093371
		16	2004	0.0235347	117.854	0.688885	1.10436	0.139783	899.947	156664698
		16	2005	0.0245757	120.15	0.654821	1.17397	0.155118	936.85	160304007
		16	2006	0.0243741	130.239	0.752175	1.1995	0.165986	969.622	164022626
		16	2007	0.0221652	141.972	0.818336	1.21681	0.227319	993.552	167808106
		16	2008	0.0166009	146.348	0.830555	1.24587	0.25074	987.846	171648984
		16	2009	0.0240253	145.996	0.886216	1.24926	0.206193	993.383	175525610
		16	2010	0.0238604	145.658	0.877968	1.27254	0.193759	987.41	179424643
		16	2011	0.0367691	144.094	0.883914	1.27223	0.166982	992.88	183340168
		16	2012	0.0251772	145.456	0.856555	1.3175	0.169254	1006.08	187280125
		16	2013	0.0651084	145.53	0.938922	1.28109	0.134139	1028.45	191260799
		16	2014	0.0398993	152.339	0.971015	1.25952	0.19797	1054.24	195305012
		16	2015	0.0402934	159.912	1.05826	1.31523	0.194746	1081.29	199426953
		16	2016	0.0489202	175.721	1.18385	1.39142	0.223621	1117.5	203631356
		16	2017	0.0708816	189.649	1.22218	1.46663	0.299222	1155.31	207906210
		16	2018	0.0876581	197.71	1.01899	1.56915	0.49579	1197.84	212228288
		16	2019	0.0818572	196.82	0.902414	1.60063	0.558268	1185.46	216565317
	Romania	17	1996	0.01386	126.191	0.548125	0.813013	0.442035	5108.6	22619004
		17	1997	0.054	115.061	0.573295	0.667315	0.401687	4874.9	22553978
		17	1998	0.05307	101.717	0.502634	0.627377	0.338523	4785.84	22507344
		17	1999	0.05198	86.3358	0.399244	0.57489	0.294283	4775.31	22472040
		17	2000	0.05456	88.858	0.419467	0.572749	0.307931	4899.18	22442971
		17	2001	0.0541064	90.9377	0.447018	0.551813	0.318451	5227.26	22131970
		17	2002	0.0544186	94.1015	0.450891	0.570608	0.342973	5627.45	21730496
		17	2003	0.0481165	98.1994	0.400354	0.616688	0.383823	5800.89	21574326
		17	2004	0.0540665	99.6366	0.45883	0.583528	0.377431	6442.41	21451748
		17	2005	0.0537921	95.632	0.443676	0.582936	0.359936	6784.93	21319685
		17	2006	0.0541947	101.331	0.437812	0.59447	0.407715	7373.22	21193760
		17	2007	0.0737173	97.8266	0.438837	0.534319	0.411151	8024.25	20882982
		17	2008	0.106682	95.6013	0.436411	0.509092	0.395594	8918.49	20537875
		17	2009	0.110991	80.5772	0.388345	0.442978	0.315402	8496.92	20367487
		17	2010	0.109099	78.1532	0.370409	0.451688	0.294821	8214.08	20246871
		17	2011	0.109593	85.0674	0.380543	0.464946	0.343674	8411.92	20147528
		17	2012	0.106323	81.6964	0.383048	0.451228	0.316819	8621.87	20058035
		17	2013	0.107085	69.8069	0.349515	0.411937	0.24608	8980.28	19983693
		17	2014	0.106968	71.0989	0.375095	0.391433	0.243316	9339.28	19908979
		17	2015	0.106007	71.8803	0.381344	0.37335	0.252322	9660.43	19815616
		17	2016	0.102175	69.5127	0.399293	0.377806	0.224564	10173	19702267
		17	2017	0.103581	72.9245	0.417988	0.40645	0.225036	10980.8	19588715
		17	2018	0.101794	73.3806	0.429629	0.416268	0.214638	11539.8	19473970
		17	2019	0.100554	71.5663	0.445513	0.386669	0.208012	12079.5	19371648
	Russian Federation	18	1996	1.09026	1562.95	5.54223	13.4828	4.90549	5714.63	148160129
		18	1997	1.08498	1463.66	5.49687	12.4347	4.52321	5804.21	147915361
		18	1998	1.03719	1445.31	5.26551	12.9445	4.23522	5505.7	147670784
		18	1999	1.21874	1445.81	5.38314	12.9048	4.26957	5876.2	147214776
		18	2000	1.30715	1452.76	5.2769	13.1829	4.4282	6491.07	146596869
		18	2001	1.36046	1466.07	5.43392	13.3981	4.31967	6851.11	145976482
		18	2002	1.39802	1465.74	5.24237	13.5603	4.33778	7206.19	145306497
		18	2003	1.47451	1494.68	5.43307	13.8814	4.36469	7767.41	144648618
		18	2004	1.4102	1489.82	5.35612	14.2423	4.18231	8360.25	144067316
		18	2005	1.44717	1465.93	5.3806	14.4144	3.95965	8929.3	143518814
		18	2006	1.50533	1534.36	5.61863	15.1825	4.06211	9693.2	143049637
		18	2007	1.53055	1527.56	5.61155	15.4374	3.93208	10535.1	142805114
		18	2008	1.5498	1553.76	5.7799	15.2189	4.21687	11087.8	142742366
		18	2009	1.54495	1445.04	5.54574	14.3204	3.8583	10219.9	142785349
		18	2010	1.5996	1492.18	5.77477	15.2611	3.79086	10675	142849468
		18	2011	1.61342	1555.83	6.15656	15.6829	3.9363	11125.3	142960908
		18	2012	1.64622	1569.05	6.2623	15.4305	4.12088	11553.6	143201721
		18	2013	1.58998	1538.76	6.29599	15.2952	3.78977	11731.4	143506995
		18	2014	1.65604	1539.8	6.60101	15.1991	3.66562	11608.8	143819667
		18	2015	1.78018	1507	6.34286	14.7123	3.85688	11355.2	144096870
		18	2016	1.78	1518.74	6.4808	15.1433	3.73672	11356.4	144342397
		18	2017	1.82827	1506.26	6.45791	15.5196	3.51398	11550.5	144496739
		18	2018	1.83046	1563.1	6.56251	16.362	3.62828	11875.7	144477859
		18	2019	1.86298	1547.64	6.71622	15.9953	3.56673	12122.6	144406261
	Slovakia	19	1996	0.11249	40.915	0.145993	0.230207	0.224223	9299.09	5373361
		19	1997	0.11073	39.5109	0.145809	0.233606	0.210569	9831.97	5383291
		19	1998	0.11394	39.1232	0.163335	0.237372	0.191755	10219	5390516
		19	1999	0.13117	38.2522	0.148085	0.240245	0.190708	10197.8	5396020
		19	2000	0.16494	36.3341	0.147114	0.241847	0.179114	10330.7	5388720
		19	2001	0.169919	39.0705	0.136305	0.258257	0.185175	10686.4	5378867
		19	2002	0.177213	38.5512	0.151879	0.245654	0.179366	11172.4	5376912
		19	2003	0.175205	39.1434	0.143338	0.237337	0.194366	11794.5	5373374
		19	2004	0.165922	38.0461	0.13685	0.230207	0.190645	12419.6	5372280
		19	2005	0.17166	38.9714	0.163998	0.247136	0.176738	13240.9	5372807
		19	2006	0.173323	37.4394	0.145932	0.225161	0.184315	14364.9	5373054
		19	2007	0.146631	35.2246	0.154026	0.21308	0.165168	15916.2	5374622
		19	2008	0.15874	36.4169	0.166106	0.216303	0.164719	16789.1	5379233
		19	2009	0.132987	33.6246	0.156143	0.185283	0.160358	15852.1	5386406
		19	2010	0.136799	36.1439	0.16363	0.209609	0.161234	16767.1	5391428
		19	2011	0.143773	33.9114	0.161011	0.194144	0.15285	17222.3	5398384
		19	2012	0.143681	32.3779	0.149268	0.182767	0.14415	17519.1	5407579
		19	2013	0.144889	32.5217	0.149453	0.190836	0.143284	17617	5413393
		19	2014	0.141997	29.9839	0.138611	0.15794	0.140722	18064.8	5418649
		19	2015	0.137937	30.2737	0.149981	0.162425	0.135658	18916.6	5423801
		19	2016	0.133753	30.6718	0.156056	0.16309	0.133895	19295.2	5430798
		19	2017	0.135729	32.8403	0.175601	0.173194	0.139916	19841.2	5439232
		19	2018	0.132806	32.2801	0.178054	0.170698	0.138868	20536.9	5446771
		19	2019	0.13623	29.7307	0.169264	0.171082	0.11314	21024.3	5454147
	Slovenia	20	1996	0.04562	14.6755	0.111022	0.0314442	0.0532561	15652	1988628
		20	1997	0.05019	15.2334	0.11111	0.033426	0.0590464	16464.5	1985956
		20	1998	0.05019	14.7001	0.106528	0.0342423	0.0597959	17041.5	1981629
		20	1999	0.04696	14.2812	0.107006	0.0357444	0.0547005	17937.5	1983045
		20	2000	0.04761	13.9983	0.101414	0.0345529	0.056836	18541.2	1988925
		20	2001	0.0522286	14.6879	0.105737	0.0355751	0.0602581	19107.5	1992060
		20	2002	0.0545667	14.9479	0.102712	0.0343143	0.0656404	19752.9	1994530
		20	2003	0.0510687	14.7808	0.10408	0.0379604	0.0622848	20325.3	1995733
		20	2004	0.0531992	15.0148	0.107489	0.0376204	0.0633248	21197.8	1997012
		20	2005	0.056978	15.2149	0.109162	0.038824	0.0635429	21964.8	2000474
		20	2006	0.0533864	15.6461	0.114352	0.0376479	0.0647942	23153	2006868
		20	2007	0.0544584	15.6881	0.11288	0.0382856	0.065864	24630.9	2018122
		20	2008	0.059613	16.8227	0.130955	0.0367703	0.0634575	25455.2	2021316
		20	2009	0.0542017	14.9723	0.11142	0.0347944	0.0589182	23321.9	2039669
		20	2010	0.0530994	15.2361	0.111837	0.036101	0.0601099	23532.5	2048583
		20	2011	0.0579814	15.2102	0.111411	0.0308901	0.0609376	23685.9	2052843
		20	2012	0.0512596	14.6972	0.109094	0.0297122	0.0578597	23012.4	2057159
		20	2013	0.0488494	14.09	0.103169	0.029184	0.055889	22744.6	2059953
		20	2014	0.0583599	12.6296	0.102031	0.0262109	0.044111	23351.2	2061980
		20	2015	0.0514371	12.6989	0.100509	0.0278076	0.0445775	23849.4	2063531
		20	2016	0.0517393	13.6324	0.107874	0.0294862	0.0476479	24592.6	2065042
		20	2017	0.0565674	13.8745	0.110469	0.0310394	0.0475003	25754.7	2066388
		20	2018	0.0516839	13.9375	0.113554	0.03071	0.046436	26786.6	2073894
		20	2019	0.0518929	13.2683	0.108237	0.0308416	0.0439003	27447.8	2088385
	South Africa	21	1996	0.11775	357.306	0.894626	0.0404804	3.03303	5745.11	42241007
		21	1997	0.12647	365.15	0.90937	0.033534	3.09991	5792.13	42987456
		21	1998	0.13601	357.552	0.923231	0.0334713	3.00682	5728.5	43682259
		21	1999	0.12837	370.111	0.93593	0.0427098	3.14172	5779.16	44338551
		21	2000	0.1301	371.65	0.951474	0.0410257	3.12468	5937.63	44967713
		21	2001	0.106494	376.476	0.971937	0.0497846	3.13585	6017.18	45571272
		21	2002	0.118363	366.563	0.996992	0.0501105	2.98295	6161.47	46150913
		21	2003	0.124195	399.779	1.03292	0.0378909	3.31548	6266.01	46719203
		21	2004	0.130246	439.145	1.07169	0.0876341	3.63278	6472.11	47291610
		21	2005	0.109353	421.664	1.07359	0.124398	3.34895	6729.83	47880595
		21	2006	0.0964766	430.859	1.09444	0.134808	3.4111	7017.71	48489464
		21	2007	0.108219	441.043	1.11689	0.136471	3.50272	7299.02	49119766
		21	2008	0.123578	475.955	1.05921	0.141189	3.90781	7432.12	49779472
		21	2009	0.120946	474.402	1.03881	0.119664	3.92821	7216.68	50477013
		21	2010	0.126971	474.864	1.08449	0.148394	3.88633	7328.62	51216967
		21	2011	0.120366	466.277	1.09721	0.154114	3.78956	7454.78	52003759
		21	2012	0.120243	462.052	1.12534	0.156864	3.69858	7500.23	52832659
		21	2013	0.130013	462.788	1.14522	0.145957	3.6994	7564.29	53687125
		21	2014	0.126376	467.191	1.12924	0.154736	3.74659	7582.95	54544184
		21	2015	0.111444	455.071	1.24597	0.155471	3.51536	7556.79	55386369
		21	2016	0.144068	473.899	1.1952	0.131568	3.78019	7476.09	56207649
		21	2017	0.141807	469.747	1.1924	0.144393	3.7186	7475.17	57009751
		21	2018	0.0992301	451.33	1.18924	0.158788	3.52894	7431.96	57792520
		21	2019	0.1212	462.061	1.17432	0.152769	3.64121	7345.96	58558267
	South Korea	22	1996	0.739243	413.619	4.39733	0.458656	1.34396	12998.7	45524681
		22	1997	0.770856	438.246	4.83399	0.55738	1.46234	13672	45953580
		22	1998	0.89689	368.56	3.91294	0.521432	1.50937	12877.4	46286503
		22	1999	1.03064	402.041	4.19918	0.634891	1.59756	14252.3	46616677
		22	2000	1.08964	428.597	4.30108	0.713079	1.79717	15414.3	47008111
		22	2001	1.11405	442.189	4.30436	0.783279	1.91438	16038.7	47370164
		22	2002	1.17566	460.961	4.38903	0.870398	2.057	17178.2	47644736
		22	2003	1.27178	470.48	4.42904	0.911659	2.14048	17627.2	47892330
		22	2004	1.27385	479.59	4.39149	1.0683	2.22731	18470	48082519
		22	2005	1.42134	487.867	4.40974	1.14381	2.29418	19225	48184561
		22	2006	1.43136	492.663	4.41102	1.20595	2.37192	20131.1	48438292
		22	2007	1.36684	504.466	4.53174	1.30614	2.49755	21191.2	48683638
		22	2008	1.43457	517.151	4.31781	1.34413	2.76747	21664.6	49054708
		22	2009	1.39561	521.794	4.37465	1.27769	2.87194	21724.2	49307835
		22	2010	1.39479	578.895	4.47837	1.62059	3.22977	23087.2	49554112
		22	2011	1.44345	604.467	4.50742	1.74404	3.50382	23754.8	49936638
		22	2012	1.39394	601.304	4.64505	1.89103	3.37608	24197.9	50199853
		22	2013	1.27915	607.959	4.6426	1.97913	3.41408	24850.4	50428893
		22	2014	1.43295	602.789	4.62125	1.80014	3.5336	25485.6	50746659
		22	2015	1.50051	609.379	4.83549	1.64339	3.57558	26063.7	51014947
		22	2016	1.46658	614.491	5.21611	1.71517	3.41221	26725.5	51217803
		22	2017	1.33584	631.067	5.2704	1.79123	3.60805	27492.6	51361911
		22	2018	1.19452	646.309	5.22422	2.08094	3.6279	28157.7	51606633
		22	2019	1.30069	623.106	5.16429	2.01722	3.43932	28675	51709098
	Spain	23	1996	0.5633	244.213	2.5113	0.361763	0.671018	24291.4	39889852
		23	1997	0.55298	263.64	2.60942	0.47336	0.768487	25085.5	40057389
		23	1998	0.58993	274.259	2.82816	0.485953	0.732313	26079.3	40223509
		23	1999	0.58852	298.793	2.92654	0.556291	0.820738	27140.2	40386875
		23	2000	0.62206	309.324	2.96502	0.63707	0.876548	28436.5	40567864
		23	2001	0.632943	313.992	3.08935	0.6865	0.802526	29350.5	40850412
		23	2002	0.622029	332.301	3.11487	0.784924	0.904265	29729.1	41431558
		23	2003	0.606851	340.082	3.18858	0.893834	0.842761	30066.9	42187645
		23	2004	0.619855	362.094	3.26379	1.05369	0.88128	30475.5	42921895
		23	2005	0.557181	374.942	3.29192	1.24927	0.858838	31059.3	43653155
		23	2006	0.578571	369.37	3.31375	1.30743	0.749772	31791.6	44397319
		23	2007	0.526922	380.538	3.33827	1.33046	0.838909	32333.5	45226803
		23	2008	0.560427	354.799	3.2226	1.46132	0.565385	32104.1	45954106
		23	2009	0.498301	316.274	3.02351	1.30708	0.394815	30623.5	46362946
		23	2010	0.578334	300.15	2.94235	1.30307	0.288764	30532.5	46576897
		23	2011	0.538588	308.529	2.80799	1.21126	0.535534	30176.4	46742697
		23	2012	0.569995	306.274	2.62464	1.19612	0.648619	29264.4	46773055
		23	2013	0.522885	274.508	2.46701	1.09181	0.47717	28939	46620045
		23	2014	0.52501	271.854	2.46057	0.99086	0.487302	29427.3	46480882
		23	2015	0.521885	287.87	2.54348	1.02758	0.573023	30579.6	46444832
		23	2016	0.530692	280.621	2.62876	1.04838	0.439452	31480	46484062
		23	2017	0.523008	298.251	2.64235	1.14164	0.563075	32340.1	46593236
		23	2018	0.498959	291.157	2.69301	1.1339	0.462743	32981.2	46797754
		23	2019	0.519505	270.888	2.69542	1.29508	0.156667	33384.9	47133521
	Sweden	24	1996	0.74274	66.7693	0.787645	0.0303196	0.129033	38407.9	8840998
		24	1997	0.69928	61.2512	0.739216	0.0299504	0.110254	39564.6	8846062
		24	1998	0.73583	68.412	0.833975	0.0296852	0.111	41247.6	8850974
		24	1999	0.73188	65.2634	0.801369	0.0297489	0.106104	42966	8857874
		24	2000	0.57316	57.7374	0.691587	0.0290936	0.107417	44941.7	8872109
		24	2001	0.716408	59.1559	0.703483	0.0328242	0.116402	45470.9	8895960
		24	2002	0.672321	59.8266	0.714391	0.0334038	0.125001	46318.8	8924958
		24	2003	0.661186	64.2227	0.76546	0.0333094	0.122556	47212.7	8958229
		24	2004	0.756921	61.8913	0.73293	0.0331643	0.126089	49066.9	8993531
		24	2005	0.703907	60.6546	0.733839	0.0315981	0.115254	50268.2	9029572
		24	2006	0.644496	62.2135	0.739927	0.0330795	0.127259	52317	9080505
		24	2007	0.640391	58.8934	0.72222	0.0341388	0.118576	53716.4	9148092
		24	2008	0.607144	56.2656	0.682055	0.0309969	0.11861	53059.5	9219637
		24	2009	0.492745	53.41	0.656359	0.041382	0.0836189	50326.2	9298515
		24	2010	0.541864	56.9492	0.655122	0.0556848	0.115311	52869	9378126
		24	2011	0.564187	52.0479	0.607401	0.0439803	0.102965	54147.9	9449213
		24	2012	0.593798	49.1493	0.598422	0.0383436	0.088303	53432.6	9519374
		24	2013	0.612525	48.129	0.590672	0.0368514	0.0901349	53611.1	9600379
		24	2014	0.594382	46.1013	0.5781	0.0302535	0.0845475	54492.6	9696110
		24	2015	0.513169	46.3905	0.566902	0.0336087	0.084486	56340	9799186
		24	2016	0.571269	46.5374	0.585304	0.0359604	0.082903	56788.5	9923085
		24	2017	0.591264	45.6575	0.581434	0.0346185	0.0826919	57467.2	10057698
		24	2018	0.613333	44.6833	0.55323	0.0366075	0.0829168	57911.2	10175214
		24	2019	0.589508	47.1767	0.591655	0.0367263	0.0822707	58112.4	10278887
	Switzerland	25	1996	0.249674	42.5044	0.532526	0.08955	0.00596	63393.5	7071850
		25	1997	0.252326	44.2021	0.560254	0.086454	0.00459	64676	7088906
		25	1998	0.256505	44.748	0.567162	0.088992	0.00381	66460.8	7110001
		25	1999	0.247611	44.1558	0.550348	0.10245	0.00396	67299.1	7143991
		25	2000	0.262621	43.1126	0.533831	0.10188	0.00577	69583.1	7184250
		25	2001	0.264513	46.2319	0.571305	0.10604	0.00603	70233.8	7229854
		25	2002	0.266953	43.9383	0.541511	0.10408	0.00556	69700.6	7284753
		25	2003	0.267709	43.2144	0.526995	0.11001	0.00571	69153	7339001
		25	2004	0.260885	43.2598	0.524435	0.11349	0.00542	70617.1	7389625
		25	2005	0.224454	44.2157	0.533889	0.11651	0.00604	72188.8	7437115
		25	2006	0.265828	44.9745	0.547181	0.11329	0.00652	74617.4	7483934
		25	2007	0.265173	40.9935	0.493585	0.11031	0.0073	76908.5	7551117
		25	2008	0.261405	43.7627	0.526107	0.11753	0.00656	78030	7647675
		25	2009	0.259663	44.2384	0.534416	0.11281	0.00619	75458.5	7743831
		25	2010	0.249039	42.0564	0.495978	0.12601	0.00621	77117.1	7824909
		25	2011	0.251006	40.0521	0.481065	0.11177	0.00574	77729	7912398
		25	2012	0.237626	41.4231	0.490087	0.12252	0.00517	77844.2	7996861
		25	2013	0.241298	43.5951	0.512981	0.12903	0.00557	78356	8089346
		25	2014	0.254309	38.713	0.459878	0.11177	0.0057	79299.8	8188649
		25	2015	0.211813	39.5267	0.46561	0.11942	0.00521	79702	8282396
		25	2016	0.192834	38.0196	0.440009	0.12546	0.00479	80448.7	8373338
		25	2017	0.184727	38.8192	0.450853	0.12599	0.00461	80964.6	8451840
		25	2018	0.218441	37.2125	0.434551	0.11951	0.00429	82792.3	8514329
		25	2019	0.225356	38.1558	0.444152	0.12261	0.00381	83093.2	8575280
	Ukraine	26	1996	0.79577	366.481	0.683331	3.01186	1.6067	1741.07	51057800
		26	1997	0.79433	352.703	0.790492	2.71204	1.56754	1704.3	50594600
		26	1998	0.75239	340.986	0.723148	2.51102	1.60644	1686.92	50144500
		26	1999	0.72065	335.04	0.544719	2.66774	1.58898	1699.5	49674000
		26	2000	0.77341	335.908	0.51256	2.67115	1.61381	1817.97	49176500
		26	2001	0.756744	329.323	0.565398	2.58938	1.57122	2006.27	48662400
		26	2002	0.769837	329.267	0.574266	2.5485	1.58111	2131.73	48202470
		26	2003	0.798405	336.63	0.594099	2.5996	1.62489	2353.6	47812949
		26	2004	0.848049	317.514	0.597565	2.57916	1.54386	2658.69	47451626
		26	2005	0.859473	315.457	0.612829	2.5996	1.56155	2758.52	47105171
		26	2006	0.868203	324.389	0.628484	2.52124	1.679	2983.85	46787786
		26	2007	0.884933	327.46	0.649368	2.37814	1.78596	3229.65	46509355
		26	2008	0.853769	317.164	0.622421	2.25889	1.75	3322.01	46258189
		26	2009	0.783171	272.379	0.605447	1.76071	1.50181	2844.32	46053331
		26	2010	0.836826	287.882	0.56926	1.96418	1.60149	2965.14	45870741
		26	2011	0.841945	302.468	0.567899	2.02057	1.7371	3138.47	45706086
		26	2012	0.83582	299.052	0.575147	1.86619	1.78852	3153.74	45593342
		26	2013	0.766926	285.689	0.532838	1.71717	1.73447	3160.08	45489648
		26	2014	0.809792	246.842	0.480914	1.45142	1.4895	3123.9	45272155
		26	2015	0.798035	194.925	0.426828	1.15159	1.14484	2828.89	45154036
		26	2016	0.732861	215.29	0.445413	1.13115	1.35862	2903.8	45004673
		26	2017	0.770186	188.107	0.456903	1.08686	1.07839	2988.5	44831135
		26	2018	0.755141	198.674	0.470544	1.10049	1.17461	3106.04	44622518
		26	2019	0.739918	185.387	0.475264	1.01872	1.07677	3224.56	44386203
	United Kingdom	27	1996	0.94671	579.374	3.65257	3.09543	1.85752	31279	58166950
		27	1997	0.98146	559.856	3.5476	3.18306	1.65663	32750.7	58316954
		27	1998	0.994859	560.75	3.53366	3.30986	1.61529	33866.2	58487141
		27	1999	0.951329	551.223	3.48433	3.52396	1.4361	34865.7	58682466
		27	2000	0.850628	566.367	3.43718	3.6483	1.53773	35959.5	58892514
		27	2001	0.895077	577.425	3.42898	3.63071	1.62916	36799.4	59119673
		27	2002	0.867149	557.883	3.40591	3.58323	1.49511	37442.3	59370479
		27	2003	0.869808	567.882	3.43163	3.59313	1.59533	38506.3	59647577
		27	2004	0.779609	573.432	3.52362	3.67156	1.53321	39163.3	59987905
		27	2005	0.790353	579.142	3.64611	3.57792	1.56709	40044.9	60401206
		27	2006	0.726035	581.694	3.6141	3.39337	1.71375	40822.5	60846820
		27	2007	0.602709	570.167	3.49778	3.43082	1.60721	41462	61322463
		27	2008	0.498778	560.416	3.41692	3.52197	1.49113	41022.3	61806995
		27	2009	0.652589	512.716	3.24754	3.28405	1.24736	39038.2	62276270
		27	2010	0.583274	528.533	3.19748	3.54574	1.29489	39536.8	62766365
		27	2011	0.643537	493.985	3.14381	2.94907	1.31671	39729.4	63258810
		27	2012	0.652847	510.181	3.05309	2.76835	1.6311	40018.5	63700215
		27	2013	0.650774	498.018	3.0023	2.74773	1.54799	40620.4	64128273
		27	2014	0.584038	456.077	2.99903	2.522	1.24575	41476.6	64602298
		27	2015	0.640641	437.766	3.08285	2.59364	0.96607	42121.7	65116219
		27	2016	0.649354	413.595	3.18331	2.90425	0.464016	42523.7	65611593
		27	2017	0.633028	401.258	3.18833	2.82777	0.379242	42970.8	66058859
		27	2018	0.58215	395.276	3.14557	2.86344	0.317431	43246.2	66460344
		27	2019	0.500845	377.804	3.08276	2.78292	0.217545	43592.4	66836327
	US	28	1996	7.10241	5407.64	35.8097	21.92	21.0503	39356.1	269394000
		28	1997	6.61731	5483.03	36.2872	22.0511	21.4948	40614.4	272657000
		28	1998	7.0916	5524.14	36.904	21.6784	21.7056	41942.7	275854000
		28	1999	7.66583	5574.14	37.9335	21.7535	21.6723	43434.7	279040000
		28	2000	7.93572	5740.68	38.3549	22.6221	22.6315	44727	282162411
		28	2001	8.04036	5650.67	38.2927	21.6237	21.9647	44728.6	284968955
		28	2002	8.10525	5672.35	38.3127	22.324	21.9544	45087.4	287625193
		28	2003	7.88469	5737.63	38.8933	21.6788	22.3723	45980.5	290107933
		28	2004	8.08883	5838.88	40.3123	21.7666	22.5179	47287.6	292805298
		28	2005	7.97095	5873.17	40.3707	21.4269	22.849	48499.8	295516599
		28	2006	7.97381	5795.22	39.8553	21.1168	22.4989	49405.8	298379912
		28	2007	8.1173	5884.22	39.6063	22.469	22.8019	49856.3	301231207
		28	2008	8.06472	5700.86	36.9853	22.6401	22.439	49319.5	304093966
		28	2009	7.94183	5289.24	35.0541	22.2346	19.7366	47648.8	306771529
		28	2010	7.97327	5485.72	35.6084	23.335	20.8819	48466.7	309327143
		28	2011	7.76003	5336.76	34.909	23.6956	19.7031	48861.9	311583481
		28	2012	7.50926	5089.84	34.1116	24.7724	17.4183	49595.9	313877662
		28	2013	7.65501	5249.56	34.7	25.4528	18.0802	50160.7	316059947
		28	2014	7.68777	5254.55	34.9382	26.0014	18.0391	51052	318386329
		28	2015	7.64212	5141.34	35.6601	26.7689	15.5847	52236.1	320738994
		28	2016	7.67806	5042.55	35.9247	26.9676	14.2587	52746.5	323071755
		28	2017	7.62584	4983.72	36.2767	26.6397	13.8693	53636.5	325122128
		28	2018	7.60135	5137.48	37.143	29.5817	13.2821	54953.6	326838199
		28	2019	7.59514	4994.49	37.132	30.5726	11.3417	55886.2	328329953
