# Supplementary material for: Nuclear energy transition and CO2 emissions nexus in 28 nuclear electricity-producing countries with different income levels
Source: PeerJ. 2022 Jul 25;10:e13780. doi: 10.7717/peerj.13780 (PMC9332342; doi:10.7717/peerj.13780)
Supplement: Supplemental Information 2 [file peerj-10-13780-s002.docx]

**APPENDIX**

List of countries.

| **Income group** | **Countries** |
| --- | --- |
| High income | Canada |
| Czech Republic |
| Finland |
| France |
| Germany |
| Hungary |
| Netherlands |
| Slovakia |
| Slovenia |
| South Korea |
| Spain |
| Sweden |
| Switzerland |
| United Kingdom |
| US |
| Belgium |
| Japan |
| Upper middle income | Argentina |
| Brazil |
| Bulgaria |
| China |
| Mexico |
| Romania |
| Russian Federation |
| South Africa |
| Lower middle income | India |
| Pakistan |
| Ukraine |
